# Supplementary material for: Systems biology reveals how altered TGFβ signalling with age reduces protection against pro-inflammatory stimuli
Source: PLoS Comput Biol. 2019 Jan 24;15(1):e1006685. doi: 10.1371/journal.pcbi.1006685 (PMC6363221; doi:10.1371/journal.pcbi.1006685)
Supplement: S1 File — Means and standard deviations of all experimental data and model parameters for simulation outputs (if changed from values provided in S2 File). (XLSX) [file pcbi.1006685.s012.xlsx]

## Sheet: Figure 1A
Fig 1. Effect of TGFβ on IL1+OSM-induced MMP13 expression. SW1353 chondrocytes were stimulated with IL-1 (0.5 ng/ml) + OSM (10 ng/ml) ± TGFβ (10 ng/ml) for the indicated durations. qPCR was then performed on isolated mRNA to measure MMP13 expression whilst glyceraldehyde 3-phosphate dehydrogenase (GAPDH) was used for normalisation purposes. A) Data are presented as fold change relative to IL-1+OS…
6 hours			6 hours			12 hours			12 hours			24 hours			24 hours			48 hours			48 hours
IL1+OSM	mean	SEM	IL1+OSM+TGF	mean	SEM	IL1+OSM	mean	SEM	IL1+OSM+TGF	mean	SEM	IL1+OSM	mean	SEM	IL1+OSM+TGF	mean	SEM	IL1+OSM	mean	SEM	IL1+OSM+TGF	mean	SEM
0.842901	1	0.0409959	1.01105	1.07101	0.0512039	1.02227	1	0.0308487	0.957375	1.09852	0.0384294	1.20087	1	0.0229042	0.548252	0.582052	0.0247669	1.07799	1	0.0391593	0.475286	0.31604	0.0171544
1.07252			1.2814			0.862437			1.02546			1.05202			0.446762			0.692505			0.25989
1.13419			1.0419			1.0344			0.813271			0.890627			0.411123			0.846688			0.271784
0.95038			1.87345			1.0809			1.04259			0.982334			0.446001			1.17301			0.370409
0.886907			1.40657			0.954377			0.841626			1.13865			0.578653			0.900338			0.447247
0.613233			0.603853			0.860637			0.990086			0.735495			0.544719			1.30948			0.428213
0.906777			0.795294			0.726891			1.00304			1.10686			0.441841			0.705225			0.097018
1.38526			1.01368			0.937598			1.44236			0.915752			0.589354			0.639381			0.347221
1.18896			0.928416			1.2193			1.31713			1.40842			0.785109			0.723296			0.563646
1.01887			1.30031			1.3012			1.22299			0.681696			0.51726			1.53395			0.129291
0.991136			1.15778			1.20122			0.975013			1.14703			0.306837			1.39815			0.227865
1.29534			1.27939			0.808091			1.31809			0.740244			0.825899			1.22508			0.110254
0.96283			0.917446			0.982676			1.2073			0.849533			0.78247			1.02139			0.477866
0.709096			1.04102			1.06307			1.31804			1.02249			0.317164			1.22196			0.288921
0.793655			1.10687			0.906376			0.879746			1.12798			0.461367			0.73202			0.26959
1.24794			1.34546			1.03857			1.37499			0.848608			0.441433			0.693303			0.135919
1.2566			1.24314			0.813296			0.837794			1.0156			0.706917			1.10625			0.145949
0.732849			1.13796			1.11319			0.958924			1.1358			0.519329			0.815785			0.213101
0.888795			0.793684			1.17603			0.881503			0.881132			0.590819			0.61372			0.381619
1.06835			0.826906			0.727971			0.686972			0.83035			0.640604			1.60666			0.283142
1.08652			0.909658			1.16951			0.816216			1.20004			0.742624			0.665509			0.265754
0.966885			0.869974			0.792404			0.855298			1.36504			0.562291			0.803729			0.35501
1.1274			0.661556			1.0784			1.11364			0.811821			0.489405			1.4946			0.217014
0.631142			1.17245			0.898396			0.527354			0.911619			0.901439			1.06886			0.268348
1.0062			1.1585			1.06419			1.24697			0.91999			0.780397			0.797429			0.288655
0.840444			1.42726			1.07417			0.64366			0.883271			0.653171			0.677311			0.301417
1.39481			0.90147			1.09244			1.20453			0.95263			0.743381			1.2654			0.400409
			0.625503			0.647091			1.1731			1.21478			0.76933			0.886708			0.394494
			1.22732			1.06935			0.92147			1.02933			0.705518			1.30429			0.475149
						1.66125			1.3099			1.01279			0.653098			0.815402			0.31796
						0.735783			1.12715			1.11498			0.524206			1.50514			0.30937
						0.865347			0.989751			0.858141			0.405818			0.96933			0.281538
						1.02118			1.47739			0.938562			0.349233			1.17528			0.240994
						1.09218			1.13568			1.07553			0.413699			0.963607			0.199461
						0.805984			1.22499			1.12176			0.325746			0.571243			0.109291
						1.04587			1.16407			1.04398			0.452745			0.935515			0.228508
						0.832902			1.5613			1.08651			0.503178			0.746518			0.26536
						0.97484			0.830838			0.993427			0.887129			0.965214			0.324919
						1.24822			1.34271			0.754329			0.678243			1.17358			0.375458
									1.62402			1.08326			0.697412			1.1779			0.443151
									1.44679			0.70557			0.766634			1.00127			0.406198
									1.2651			1.1327			0.539575			0.957702			0.321285
									1.13994			1.07846						0.798247			0.531412
												1.10459						1.29474			0.33289
												0.842114						0.978599			0.294878
												1.01649						1.00954			0.361012
												1.0092						0.961168			0.619696
												0.908448
												1.11916

## Sheet: Figure 1B
Fig 1. Effect of TGFβ on IL1+OSM-induced MMP13 expression. SW1353 chondrocytes were stimulated with IL-1 (0.5 ng/ml) + OSM (10 ng/ml) ± TGFβ (10 ng/ml) for the indicated durations. qPCR was then performed on isolated mRNA to measure MMP13 expression whilst glyceraldehyde 3-phosphate dehydrogenase (GAPDH) was used for normalisation purposes. A) Data are presented as fold change relative to IL-1+OS…
6 hours			6 hours			12 hours			12 hours			24 hours			24 hours			48 hours			48 hours
IL1+OSM	mean	SEM	IL1+OSM+TGF	mean	SEM	IL1+OSM	mean	SEM	IL1+OSM+TGF	mean	SEM	IL1+OSM	mean	SEM	IL1+OSM+TGF	mean	SEM	IL1+OSM	mean	SEM	IL1+OSM+TGF	mean	SEM
197.542	97.4995	10.6189	161.753	98.6426	9.14379	220.608	281.652	21.85	419.497	277.347	23.8598	428.018	452.574	36.5987	260.873	298.076	38.4427	664.316	430.927	33.8574	175.196	134.374	10.9142
170.804			115.992			295.016			368.36			331.144			197.525			836.437			170.463
167.947			131.615			250.845			549.847			390.805			171.921			833.365			155.128
163.769			139.941			401.353			387.179			351.013			316.663			829.334			132.788
157.777			170.106			406.578			637.33			639.383			389.241			314.756			109.903
151.997			157.17			348.144			417.625			200.412			325.784			711.012			60.2197
139.721			178.89			566.357			396.859			1075.09			370.779			685.405			162.265
125.309			124.769			294.913			532.283			152.789			383.721			449.288			188.434
121.73			129.992			334.36			283.251			717.982			347.668			534.102			230.727
115.206			143.001			364.565			411.229			368.666			556.761			530.108			266.615
100.341			136.762			399.777			440.475			945.137			409.018			530.949			314.685
89.6506			103.998			396.066			349.331			352.576			465.323			647.579			288.444
60.0264			119.194			109.6			464.286			229.645			504.533			442.979			68.9637
51.9464			46.3064			444.314			100.521			164.825			97.3327			122.854			37.7099
51.5202			58.6884			93.4449			135.892			355.696			57.6464			308.522			39.4357
49.122			47.7192			370.45			124.469			183.104			66.1991			100.482			53.7461
44.15			85.8047			107.073			135.886			184.426			64.1763			330.485			64.8953
43.5277			64.4212			464.286			90.6994			203.055			84.1152			170.203			62.1335
39.2928			26.1664			101.311			141.758			783.494			75.7006			410.101			191.843
38.6051			34.4619			439.103			165.764			781.501			160.957			156.415			111.214
38.4318			43.9251			123.843			189.73			707.499			123.057			130.638			142.338
26.5728			40.2304			83.3119			174.412			653.225			126.535			190.004			119.63
			56.3453			232.686			135.923			468.161			139.095			334.557			133.596
			50.1694			231.396			161.494			443.4			97.8979			404.041			124.919
						220.254			169.227			362.415			1172.1			280.704			178.466
						160.917			220.343			293.471			337.498			807.679			165.945
						144.035			104.341						745.933			524.428			163.493
									246.722									540.548			109.095
									127.353									809.101			196.92
									238.325									325.683			305.617
																		381.944			86.9268
																		751.347			184.779
																		367.485			93.3413
																		323.115			172.415
																		296.094			136.288
																		294.511			20.4362
																		152.357			73.1398
																		148.551			118.728
																		134.681			27.2342
																					47.9982
																					23.2243

## Sheet: Figure 3
Fig 3. Simulating the TGFβ mediated repression of IL-1+OSM-driven MMP13 expression. (A, C, E) Deterministic model run over a simulation time of 48 h. A constantly active form of TGFβ is present in the model to replicate experimental conditions. The red lines show IL-1+OSM-induced MMP13 modelled in the absence of TGFβ whilst the blue lines show the model with TGFβ included. (A) Modelled with only …
Initial concentrations
IL1+OSM simulation:
Tgfb_I = 0
All other initial concentrations as in S2 File (Table S1)
IL1+OSM+TGF simulation:
Tgfb_I = 0
Tgfb_A = 200
All other initial concentrations as in S2 File (Table S1)

## Sheet: Figure 4
Fig 4. Average behaviour of 100 stochastic model runs showing inherent variation in the system. Stochastic simulation results showing the average behaviour ± the standard deviations of 100 stochastic runs of the complete model (Fig 3), run over a simulation time of 48 h. The model was run with IL-1+OSM (red line) or IL-1+OSM±TGFβ (blue line) where an active form of TGFβ was used. Curves show how …
Initial concentrations
IL1+OSM simulation:
Tgfb_I = 0
All other initial concentrations as in S2 File (Table S1)
IL1+OSM+TGF simulation:
Tgfb_I = 0
Tgfb_A = 200
All other initial concentrations as in S2 File (Table S1)

## Sheet: Figure 5
Fig 5. Modelling age-related changes of TGF-β responses to a pro-inflammatory stimulus. Deterministic simulation results for the model presented in Fig 4 run over a 24 month simulation time, using COPASI. The simulation was run with an inactive form of TGFβ present to allow for the activation and deactivation of the growth factor throughout the simulation. IL-1+OSM were triggered using events at …
Initial concentrations
24 month simulation no TGF:
IL1 = 0
OSM = 0
Tgfb_I = 0
All other initial concentrations as in S2 File (Table S1)
Events:
name	trigger	assignments
4 month IL1+OSM	Time > 1.051e+7	IL1 = 100
		OSM = 1000
9 month IL1+OSM	Time > 2.365e+7	IL1 = 100
		OSM = 1000
23 month IL1+OSM	Time > 6.044e+7	IL1 = 100
		OSM = 1000
24 month simulation with TGF:
IL1 = 0
OSM = 0
All other initial concentrations as in S2 File (Table S1)
Events:
name	trigger	assignments
4 month IL1+OSM	Time > 1.051e+7	IL1 = 100
		OSM = 1000
9 month IL1+OSM	Time > 2.365e+7	IL1 = 100
		OSM = 1000
23 month IL1+OSM	Time > 6.044e+7	IL1 = 100
		OSM = 1000

## Sheet: Fig 6a
Fig 6. The effects of Anti-TGF treatment, on MMP-13 mRNA expression. Deterministic simulation results for the complete model, with an extra reaction to allow RUNX2 inactivation. The data show the change in MMP-13 mRNA across a 30-month simulation time. IL-1+OSM were triggered using events at 4, 9 and 23 months. The model also contained the species “Anti-TGF” which targeted and degraded both activ…
New reaction (all simulations)
Reaction = Runx2_A -> Runx2_I
Parameter value = 0.001 s-1
Reaction = Tgfb_I + Anti-TGF -> Anti-TGF
Parameter value = 5.49455e-7 mol-1 s-1
Reaction = Tgfb_A + Anti-TGF -> Anti-TGF
Parameter value = 5.49455e-7 mol-1 s-1
Reaction Anti-TGF -> Sink
Parameter value = 3.50413e-5 s-1
Initial concentrations
30 month simulation no TGF:
IL1 = 0
OSM = 0
Tgfb_I = 0
Events:
name = 4 month IL1+OSM
trigger = Time > 1.051e+7
assignment;
IL1 = 100
OSM = 1000
name = 9 month IL1+OSM
trigger = Time > 2.365e+7
assignment;
IL1 = 100
OSM = 1000
name = 23 month IL1+OSM
trigger = Time > 6.044e+7
assignment;
IL1 = 100
OSM = 1000
30 Month simulation with TGF:
IL1 = 0
OSM = 0
Events:
name = 4 month IL1+OSM
trigger = Time > 1.051e+7
assignment;
IL1 = 100
OSM = 1000
name = 9 month IL1+OSM
trigger = Time > 2.365e+7
assignment;
IL1 = 100
OSM = 1000
name = 23 month IL1+OSM
trigger = Time > 6.044e+7
assignment;
IL1 = 100
OSM = 1000
30 Month simulation with TGF plus anti-TGF once :
IL1 = 0
OSM = 0
Events:
name = 4 month IL1+OSM
trigger = Time > 1.051e+7
assignment;
IL1 = 100
OSM = 1000
name = 9 month IL1+OSM
trigger = Time > 2.365e+7
assignment;
IL1 = 100
OSM = 1000
name = 23 month IL1+OSM
trigger = Time > 6.044e+7
assignment;
IL1 = 100
OSM = 1000
name = Anti-TGF
trigger = Time > 1.5e+7
assignment;
Anti-TGF = 200
30 Month simulation with TGF plus anti-TGF twice :
IL1 = 0
OSM = 0
Events:
name = 4 month IL1+OSM
trigger = Time > 1.051e+7
assignment;
IL1 = 100
OSM = 1000
name = 9 month IL1+OSM
trigger = Time > 2.365e+7
assignment;
IL1 = 100
OSM = 1000
name = 23 month IL1+OSM
trigger = Time > 6.044e+7
assignment;
IL1 = 100
OSM = 1000
name = Anti-TGF
trigger = Time > 1.5e+7
assignment;
Anti-TGF = 200
name = Anti-TGF
trigger = Time > 1.7e+7
assignment;
Anti-TGF = 200
30 Month simulation with TGF plus anti-TGF thrice :
IL1 = 0
OSM = 0
Events:
name = 4 month IL1+OSM
trigger = Time > 1.051e+7
assignment;
IL1 = 100
OSM = 1000
name = 9 month IL1+OSM
trigger = Time > 2.365e+7
assignment;
IL1 = 100
OSM = 1000
name = 23 month IL1+OSM
trigger = Time > 6.044e+7
assignment;
IL1 = 100
OSM = 1000
name = Anti-TGF
trigger = Time > 1.5e+7
assignment;
Anti-TGF = 200
name = Anti-TGF
trigger = Time > 1.7e+7
assignment;
Anti-TGF = 200
name = Anti-TGF
trigger = Time > 1.9e+7
assignment;
Anti-TGF = 200

## Sheet: Fig 6b
New reaction (all simulations)
Reaction = Runx2_A -> Runx2_I
Parameter value = 0.001 s-1
Reaction = Tgfb_I + Anti-TGF -> Anti-TGF
Parameter value = 5.49455e-7 mol-1 s-1
Reaction = Tgfb_A + Anti-TGF -> Anti-TGF
Parameter value = 5.49455e-7 mol-1 s-1
Reaction Anti-TGF -> Sink
Parameter value = 3.50413e-5 s-1
Initial concentrations
30 month simulation no TGF:
IL1 = 0
OSM = 0
Tgfb_I = 0
Events:
name = 4 month IL1+OSM
trigger = Time > 1.051e+7
assignment;
IL1 = 100
OSM = 1000
name = 9 month IL1+OSM
trigger = Time > 2.365e+7
assignment;
IL1 = 100
OSM = 1000
name = 23 month IL1+OSM
trigger = Time > 6.044e+7
assignment;
IL1 = 100
OSM = 1000
30 Month simulation with TGF:
IL1 = 0
OSM = 0
Events:
name = 4 month IL1+OSM
trigger = Time > 1.051e+7
assignment;
IL1 = 100
OSM = 1000
name = 9 month IL1+OSM
trigger = Time > 2.365e+7
assignment;
IL1 = 100
OSM = 1000
name = 23 month IL1+OSM
trigger = Time > 6.044e+7
assignment;
IL1 = 100
OSM = 1000
30 Month simulation with TGF plus anti-TGF every day :
IL1 = 0
OSM = 0
Events:
name = 4 month IL1+OSM
trigger = Time > 1.051e+7
assignment;
IL1 = 100
OSM = 1000
name = 9 month IL1+OSM
trigger = Time > 2.365e+7
assignment;
IL1 = 100
OSM = 1000
name = 23 month IL1+OSM
trigger = Time > 6.044e+7
assignment;
IL1 = 100
OSM = 1000
name = Anti-TGF
trigger = Time > 1.5e+7
assignment;
Anti-TGF = 200
name = Anti-TGF
trigger = Time > 1.51e+7
assignment;
Anti-TGF = 200
name = Anti-TGF
trigger = Time > 1.52e+7
assignment;
Anti-TGF = 200
30 Month simulation with TGF plus anti-TGF every 6 days :
IL1 = 0
OSM = 0
Events:
name = 4 month IL1+OSM
trigger = Time > 1.051e+7
assignment;
IL1 = 100
OSM = 1000
name = 9 month IL1+OSM
trigger = Time > 2.365e+7
assignment;
IL1 = 100
OSM = 1000
name = 23 month IL1+OSM
trigger = Time > 6.044e+7
assignment;
IL1 = 100
OSM = 1000
name = Anti-TGF
trigger = Time > 1.5e+7
assignment;
Anti-TGF = 200
name = Anti-TGF
trigger = Time > 1.55e+7
assignment;
Anti-TGF = 200
name = Anti-TGF
trigger = Time > 1.2e+7
assignment;
Anti-TGF = 200
23 Month simulation with TGF plus anti-TGF every 12 days :
IL1 = 0
OSM = 0
Events:
name = 4 month IL1+OSM
trigger = Time > 1.051e+7
assignment;
IL1 = 100
OSM = 1000
name = 9 month IL1+OSM
trigger = Time > 2.365e+7
assignment;
IL1 = 100
OSM = 1000
name = 23 month IL1+OSM
trigger = Time > 6.044e+7
assignment;
IL1 = 100
OSM = 1000
name = Anti-TGF
trigger = Time > 1.5e+7
assignment;
Anti-TGF = 200
name = Anti-TGF
trigger = Time > 1.6e+7
assignment;
Anti-TGF = 200
name = Anti-TGF
trigger = Time > 1.7e+7
assignment;
Anti-TGF = 200
30 Month simulation with TGF plus anti-TGF every 24 days :
IL1 = 0
OSM = 0
Events:
name = 4 month IL1+OSM
trigger = Time > 1.051e+7
assignment;
IL1 = 100
OSM = 1000
name = 9 month IL1+OSM
trigger = Time > 2.365e+7
assignment;
IL1 = 100
OSM = 1000
name = 23 month IL1+OSM
trigger = Time > 6.044e+7
assignment;
IL1 = 100
OSM = 1000
name = Anti-TGF
trigger = Time > 1.5e+7
assignment;
Anti-TGF = 200
name = Anti-TGF
trigger = Time > 1.7e+7
assignment;
Anti-TGF = 200
name = Anti-TGF
trigger = Time > 1.9e+7
assignment;
Anti-TGF = 200

## Sheet: fig6c
New reaction (all simulations)
Reaction = Runx2_A -> Runx2_I
Parameter value = 0.001 s-1
Reaction = Tgfb_I + Anti-TGF -> Anti-TGF
Parameter value = 5.49455e-7 mol-1 s-1
Reaction = Tgfb_A + Anti-TGF -> Anti-TGF
Parameter value = 5.49455e-7 mol-1 s-1
Reaction Anti-TGF -> Sink
Parameter value = 3.50413e-5 s-1
Initial concentrations
30 month simulation no TGF:
IL1 = 0
OSM = 0
Tgfb_I = 0
Events:
name = 4 month IL1+OSM
trigger = Time > 1.051e+7
assignment;
IL1 = 100
OSM = 1000
name = 9 month IL1+OSM
trigger = Time > 2.365e+7
assignment;
IL1 = 100
OSM = 1000
name = 23 month IL1+OSM
trigger = Time > 6.044e+7
assignment;
IL1 = 100
OSM = 1000
30 Month simulation with TGF:
IL1 = 0
OSM = 0
Events:
name = 4 month IL1+OSM
trigger = Time > 1.051e+7
assignment;
IL1 = 100
OSM = 1000
name = 9 month IL1+OSM
trigger = Time > 2.365e+7
assignment;
IL1 = 100
OSM = 1000
name = 23 month IL1+OSM
trigger = Time > 6.044e+7
assignment;
IL1 = 100
OSM = 1000
23 Month simulation with TGF plus anti-TGF once :
IL1 = 0
OSM = 0
Events:
name = 4 month IL1+OSM
trigger = Time > 1.051e+7
assignment;
IL1 = 100
OSM = 1000
name = 9 month IL1+OSM
trigger = Time > 2.365e+7
assignment;
IL1 = 100
OSM = 1000
name = 23 month IL1+OSM
trigger = Time > 6.044e+7
assignment;
IL1 = 100
OSM = 1000
name = Anti-TGF
trigger = Time > 5e+7
assignment;
Anti-TGF = 200
30 Month simulation with TGF plus anti-TGF twice :
IL1 = 0
OSM = 0
Events:
name = 4 month IL1+OSM
trigger = Time > 1.051e+7
assignment;
IL1 = 100
OSM = 1000
name = 9 month IL1+OSM
trigger = Time > 2.365e+7
assignment;
IL1 = 100
OSM = 1000
name = 23 month IL1+OSM
trigger = Time > 6.044e+7
assignment;
IL1 = 100
OSM = 1000
name = Anti-TGF
trigger = Time > 5e+7
assignment;
Anti-TGF = 200
name = Anti-TGF
trigger = Time > 5.2e+7
assignment;
Anti-TGF = 200
30 Month simulation with TGF plus anti-TGF thrice :
IL1 = 0
OSM = 0
Events:
name = 4 month IL1+OSM
trigger = Time > 1.051e+7
assignment;
IL1 = 100
OSM = 1000
name = 9 month IL1+OSM
trigger = Time > 2.365e+7
assignment;
IL1 = 100
OSM = 1000
name = 23 month IL1+OSM
trigger = Time > 6.044e+7
assignment;
IL1 = 100
OSM = 1000
name = Anti-TGF
trigger = Time > 5e+7
assignment;
Anti-TGF = 200
name = Anti-TGF
trigger = Time > 5.2e+7
assignment;
Anti-TGF = 200
name = Anti-TGF
trigger = Time > 5.4e+7
assignment;
Anti-TGF = 200

## Sheet: fig6d
New reaction (all simulations)
Reaction = Runx2_A -> Runx2_I
Parameter value = 0.001 s-1
Reaction = Tgfb_I + Anti-TGF -> Anti-TGF
Parameter value = 5.49455e-7 mol-1 s-1
Reaction = Tgfb_A + Anti-TGF -> Anti-TGF
Parameter value = 5.49455e-7 mol-1 s-1
Reaction Anti-TGF -> Sink
Parameter value = 3.50413e-5 s-1
Initial concentrations
30 month simulation no TGF:
IL1 = 0
OSM = 0
Tgfb_I = 0
Events:
name = 4 month IL1+OSM
trigger = Time > 1.051e+7
assignment;
IL1 = 100
OSM = 1000
name = 9 month IL1+OSM
trigger = Time > 2.365e+7
assignment;
IL1 = 100
OSM = 1000
name = 23 month IL1+OSM
trigger = Time > 6.044e+7
assignment;
IL1 = 100
OSM = 1000
30 Month simulation with TGF:
IL1 = 0
OSM = 0
Events:
name = 4 month IL1+OSM
trigger = Time > 1.051e+7
assignment;
IL1 = 100
OSM = 1000
name = 9 month IL1+OSM
trigger = Time > 2.365e+7
assignment;
IL1 = 100
OSM = 1000
name = 23 month IL1+OSM
trigger = Time > 6.044e+7
assignment;
IL1 = 100
OSM = 1000
30 Month simulation with TGF plus anti-TGF every day :
IL1 = 0
OSM = 0
Events:
name = 4 month IL1+OSM
trigger = Time > 1.051e+7
assignment;
IL1 = 100
OSM = 1000
name = 9 month IL1+OSM
trigger = Time > 2.365e+7
assignment;
IL1 = 100
OSM = 1000
name = 23 month IL1+OSM
trigger = Time > 6.044e+7
assignment;
IL1 = 100
OSM = 1000
name = Anti-TGF
trigger = Time > 5e+7
assignment;
Anti-TGF = 200
name = Anti-TGF
trigger = Time > 5.01e+7
assignment;
Anti-TGF = 200
name = Anti-TGF
trigger = Time > 5.02e+7
assignment;
Anti-TGF = 200
30 Month simulation with TGF plus anti-TGF every 6 days :
IL1 = 0
OSM = 0
Events:
name = 4 month IL1+OSM
trigger = Time > 1.051e+7
assignment;
IL1 = 100
OSM = 1000
name = 9 month IL1+OSM
trigger = Time > 2.365e+7
assignment;
IL1 = 100
OSM = 1000
name = 23 month IL1+OSM
trigger = Time > 6.044e+7
assignment;
IL1 = 100
OSM = 1000
name = Anti-TGF
trigger = Time > 5e+7
assignment;
Anti-TGF = 200
name = Anti-TGF
trigger = Time > 5.05e+7
assignment;
Anti-TGF = 200
name = Anti-TGF
trigger = Time > 5.1e+7
assignment;
Anti-TGF = 200
30 Month simulation with TGF plus anti-TGF every 12 days :
IL1 = 0
OSM = 0
Events:
name = 4 month IL1+OSM
trigger = Time > 1.051e+7
assignment;
IL1 = 100
OSM = 1000
name = 9 month IL1+OSM
trigger = Time > 2.365e+7
assignment;
IL1 = 100
OSM = 1000
name = 23 month IL1+OSM
trigger = Time > 6.044e+7
assignment;
IL1 = 100
OSM = 1000
name = Anti-TGF
trigger = Time > 5e+7
assignment;
Anti-TGF = 200
name = Anti-TGF
trigger = Time > 5.1e+7
assignment;
Anti-TGF = 200
name = Anti-TGF
trigger = Time > 5.2e+7
assignment;
Anti-TGF = 200
30 Month simulation with TGF plus anti-TGF every 24 days :
IL1 = 0
OSM = 0
Events:
name = 4 month IL1+OSM
trigger = Time > 1.051e+7
assignment;
IL1 = 100
OSM = 1000
name = 9 month IL1+OSM
trigger = Time > 2.365e+7
assignment;
IL1 = 100
OSM = 1000
name = 23 month IL1+OSM
trigger = Time > 6.044e+7
assignment;
IL1 = 100
OSM = 1000
name = Anti-TGF
trigger = Time > 5e+7
assignment;
Anti-TGF = 200
name = Anti-TGF
trigger = Time > 5.2e+7
assignment;
Anti-TGF = 200
name = Anti-TGF
trigger = Time > 5.4e+7
assignment;
Anti-TGF = 200

## Sheet: fig 7a
Fig 7. The effects of targeting type one receptors, at 6 or 19 months, on MMP-13 mRNA expression. Deterministic simulation results for the complete model, with an extra reaction to allow RUNX2 inactivation. The data show the change in MMP-13 mRNA across a 30-month simulation time. IL-1+OSM were triggered using events at 4, 9 and 23 months. A) The model also contained the species “Anti-ALK1” which…
New reaction (all simulations)
Reaction = Runx2_A -> Runx2_I
Parameter value = 0.001 s-1
Reaction = ALK1 + Anti-ALK1 -> Anti-ALK1
Parameter value = 5.49455e-7 mol-1 s-1
Reaction antiALK1 -> Sink
Parameter value = 3.50413e-5 s-1
Initial concentrations
30 month simulation no TGF:
IL1 = 0
OSM = 0
Tgfb_I = 0
Events:
name = 4 month IL1+OSM
trigger = Time > 1.051e+7
assignment;
IL1 = 100
OSM = 1000
name = 9 month IL1+OSM
trigger = Time > 2.365e+7
assignment;
IL1 = 100
OSM = 1000
name = 23 month IL1+OSM
trigger = Time > 6.044e+7
assignment;
IL1 = 100
OSM = 1000
30 Month simulation with TGF:
IL1 = 0
OSM = 0
Events:
name = 4 month IL1+OSM
trigger = Time > 1.051e+7
assignment;
IL1 = 100
OSM = 1000
name = 9 month IL1+OSM
trigger = Time > 2.365e+7
assignment;
IL1 = 100
OSM = 1000
name = 23 month IL1+OSM
trigger = Time > 6.044e+7
assignment;
IL1 = 100
OSM = 1000
30 Month simulation with TGF plus anti-ALK1 early :
IL1 = 0
OSM = 0
Events:
name = 4 month IL1+OSM
trigger = Time > 1.051e+7
assignment;
IL1 = 100
OSM = 1000
name = 9 month IL1+OSM
trigger = Time > 2.365e+7
assignment;
IL1 = 100
OSM = 1000
name = 23 month IL1+OSM
trigger = Time > 6.044e+7
assignment;
IL1 = 100
OSM = 1000
name = Anti-ALK1
trigger = Time > 1.5e+7
assignment;
Anti-ALK1 = 200
23 Month simulation with TGF plus anti-ALK1 late :
IL1 = 0
OSM = 0
Events:
name = 4 month IL1+OSM
trigger = Time > 1.051e+7
assignment;
IL1 = 100
OSM = 1000
name = 9 month IL1+OSM
trigger = Time > 2.365e+7
assignment;
IL1 = 100
OSM = 1000
name = 23 month IL1+OSM
trigger = Time > 6.044e+7
assignment;
IL1 = 100
OSM = 1000
name = Anti-ALK1
trigger = Time > 5e+7
assignment;
Anti-ALK1 = 200

[truncated: 2 more sheets: fig7b, fig 7c]
